# Supplementary material
Source: MDPI journal article supplement (https://www.mdpi.com/2073-445X/12/1/125)
Supplement: s1 [file s1]

Archive with 1 entries (1 files):
- land-2124825_supplementary material2.pdf
