# Supplementary material
Source: MDPI journal article supplement (https://www.mdpi.com/2073-445X/12/1/125)
Supplement: s1 [file s1 › land-2124825_supplementary material2.pdf]

Supplementary material

Remaining local coefficient estimates of GWR model

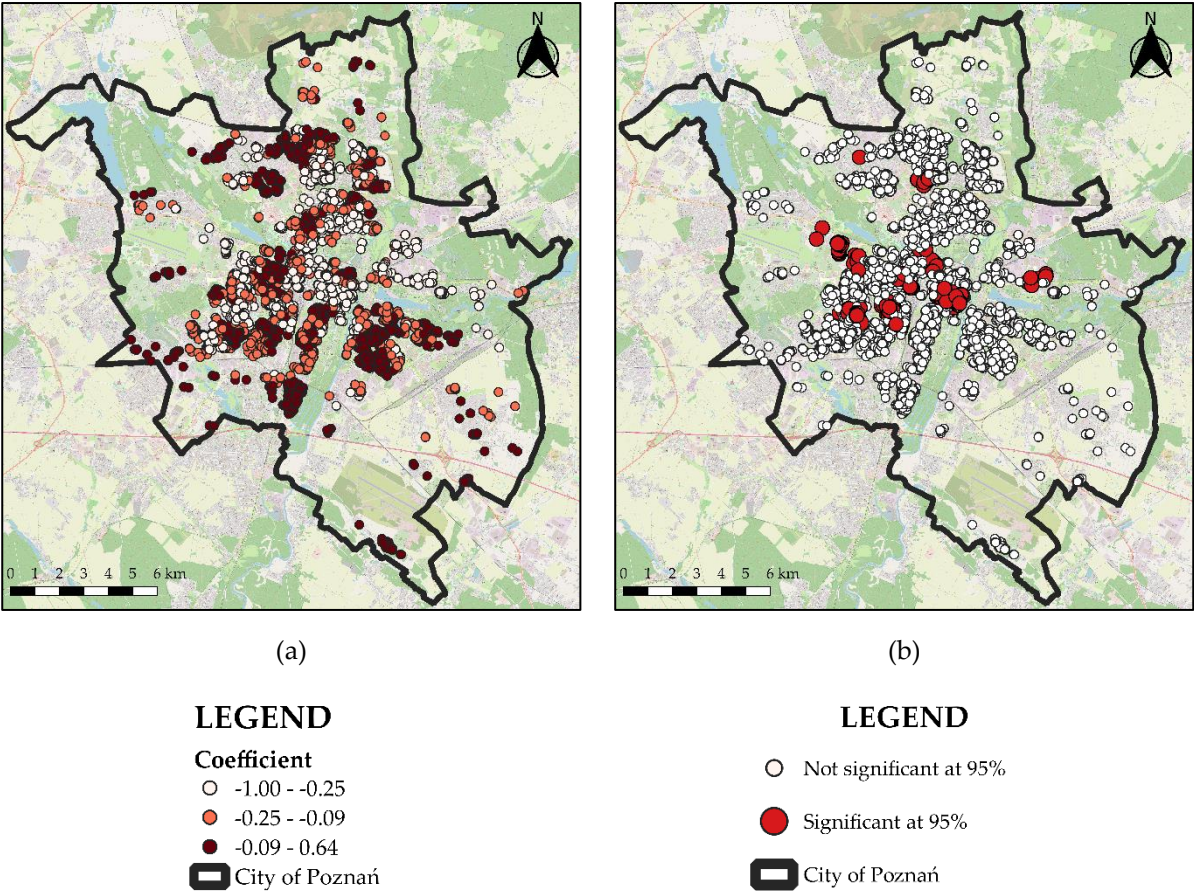

Figure S1. (a) Local estimated coefficients – Number of rooms. (b) Statistical significance of estimated coefficients – Number of rooms.

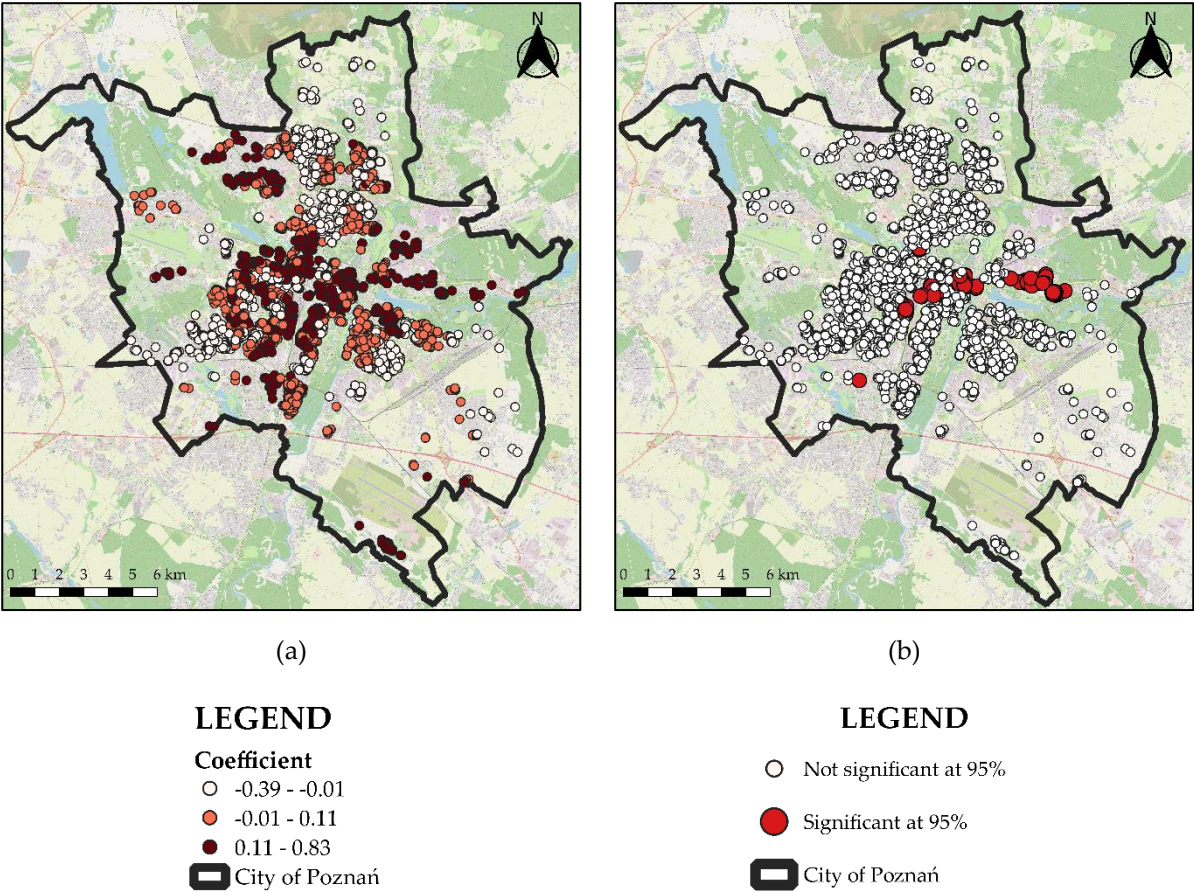

Figure S2. (a) Local estimated coefficients – Floor number. (b) Statistical significance of estimated coefficients – Floor number.

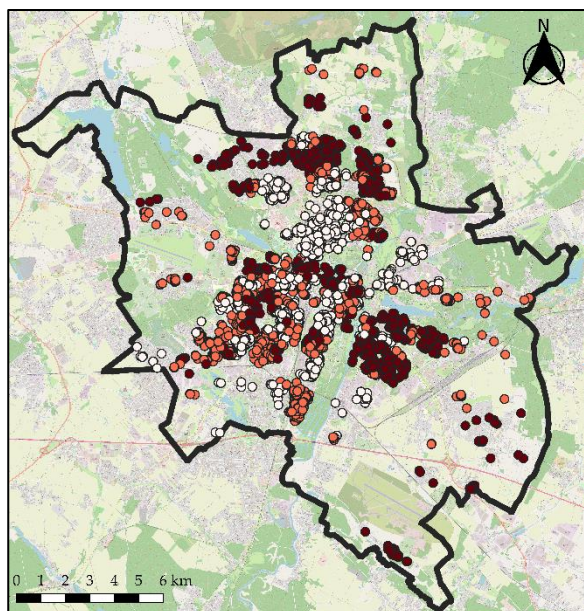

(a)

### LEGEND

#### Coefficient

- -3.73 - -0.10
- -0.10 - 0.03
- 0.03 - 33.8
- ▭ City of Poznań

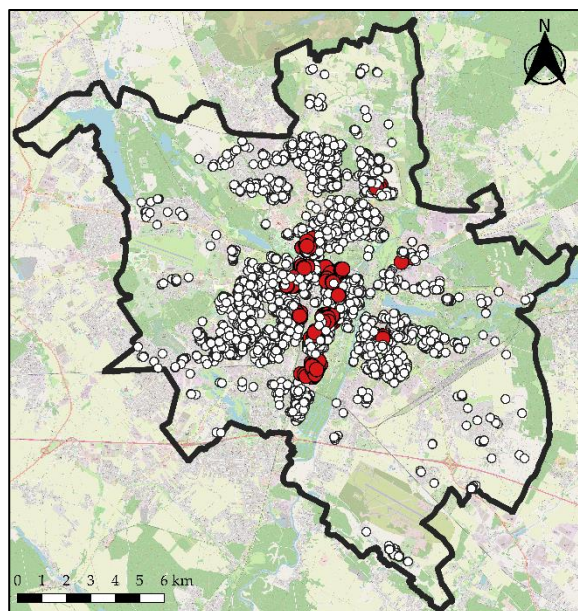

(b)

### LEGEND

- Not significant at 95%
- Significant at 95%
- ▭ City of Poznań

**Figure S3. (a)** Local estimated coefficients – Number of associated premises. **(b)** Statistical significance of estimated coefficients – Number of associated premises.

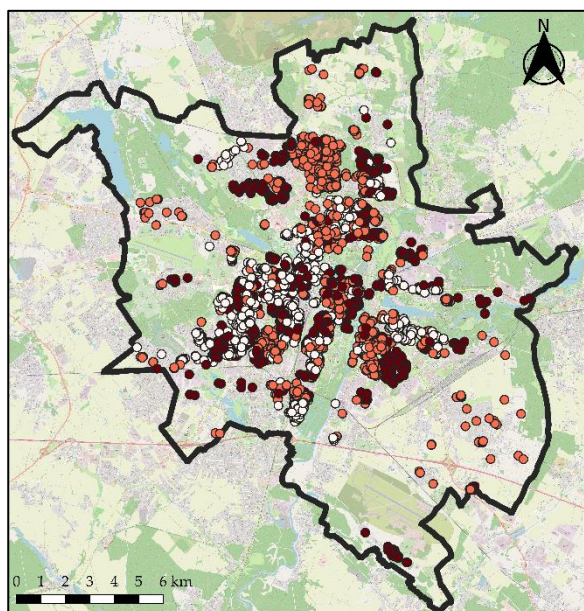

(a)

### LEGEND

#### Coefficient

- -72.23 - -0.41
- -0.41 - 0.24
- 0.24 - 126.93
- ▭ City of Poznań

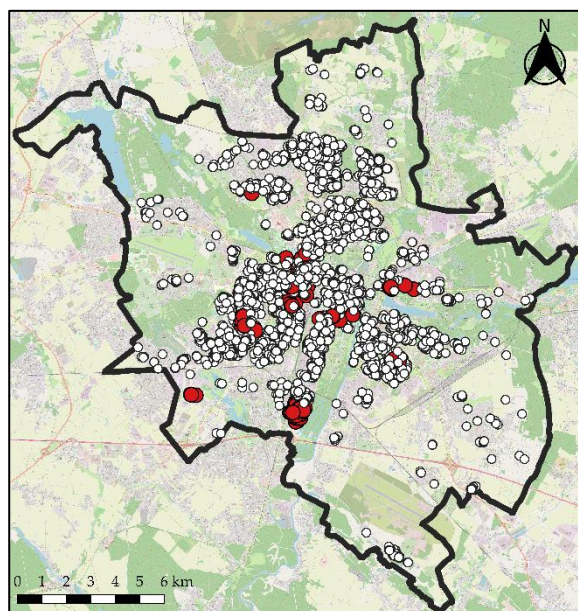

(b)

### LEGEND

- Not significant at 95%
- Significant at 95%
- ▭ City of Poznań

**Figure S4. (a)** Local estimated coefficients – Distance to the shopping center. **(b)** Statistical significance of estimated coefficients – Distance to the shopping center.

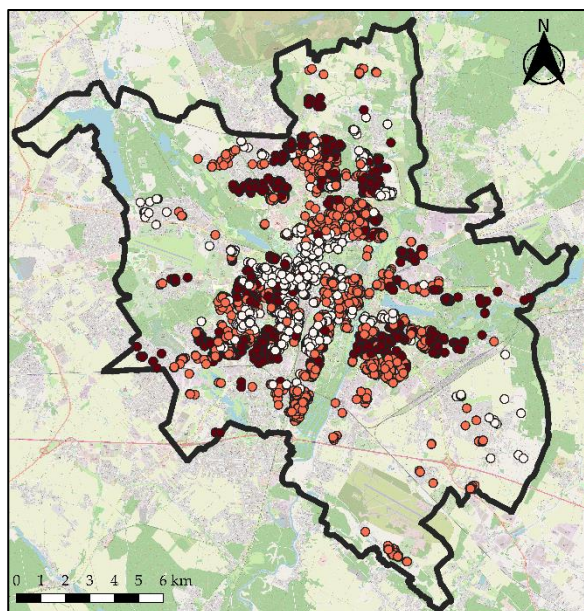

(a)

### LEGEND

#### Coefficient

- -17.97 - -0.26
- -0.26 - 0.17
- 0.17 - 9.38
- ▭ City of Poznań

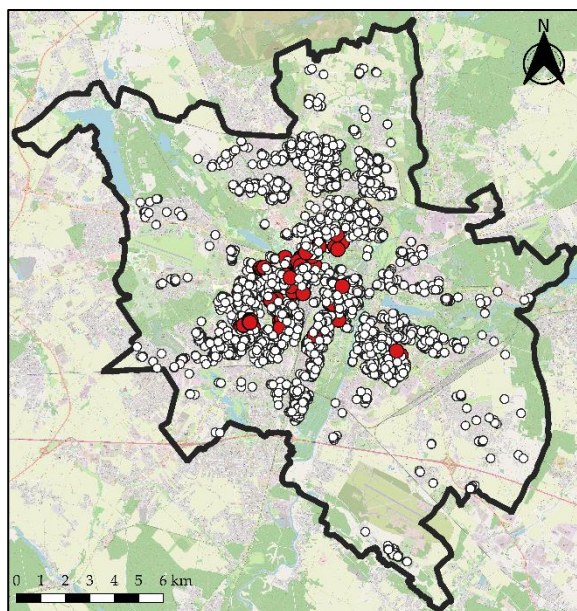

(b)

### LEGEND

- Not significant at 95%
- Significant at 95%
- ▭ City of Poznań

**Figure S5. (a) Local estimated coefficients – Distance to park. (b) Statistical significance of estimated coefficients – Distance to park.**

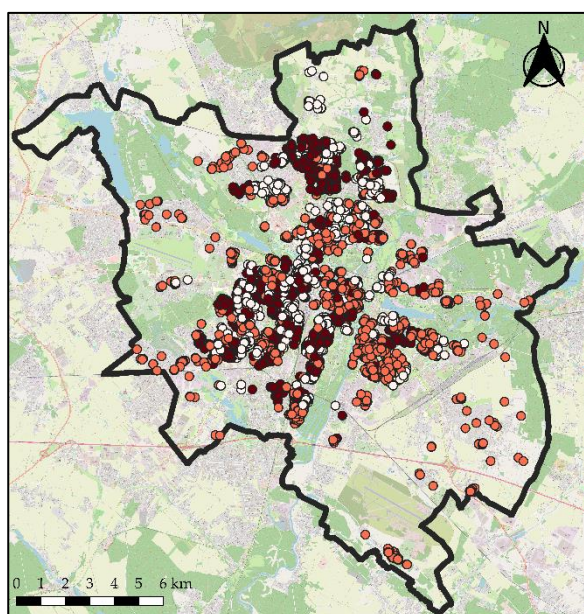

(a)

### LEGEND

#### Coefficient

- -390.30 - -1.80
- -1.80 - 2.10
- 2.10 - 499.60
- ▭ City of Poznań

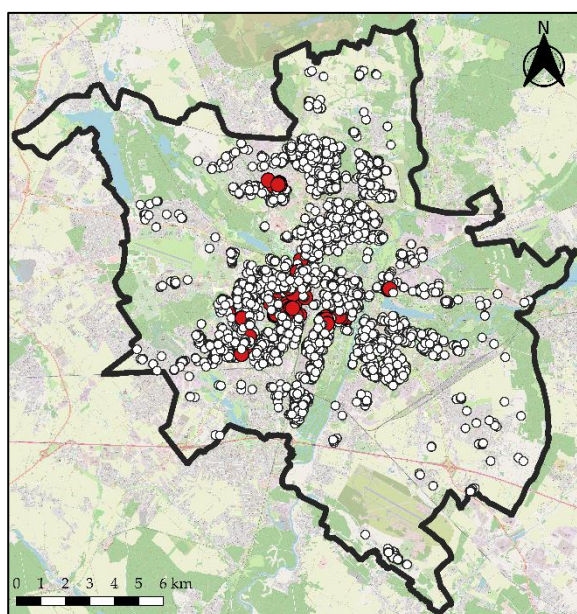

(b)

### LEGEND

- Not significant at 95%
- Significant at 95%
- ▭ City of Poznań

**Figure S6. (a) Local estimated coefficients – Distance to the center of Poznań. (b) Statistical significance of estimated coefficients – Distance to the center of Poznań.**

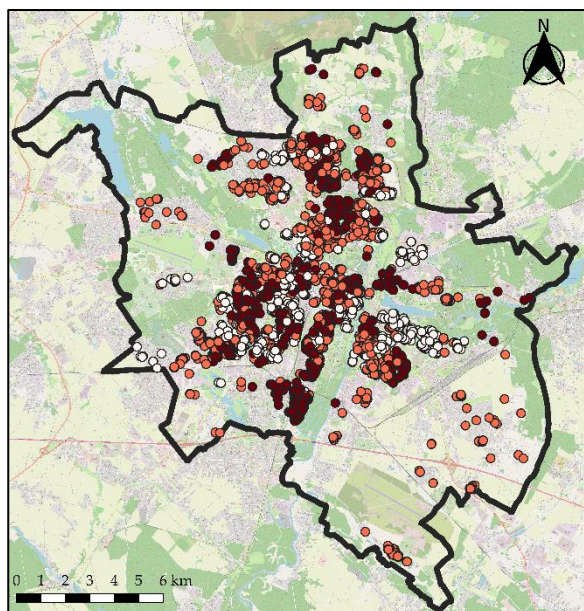

(a)

### LEGEND

#### Coefficient

- -19.19 - -0.68
- -0.68 - 0.13
- 0.13 - 11.34
- ▭ City of Poznań

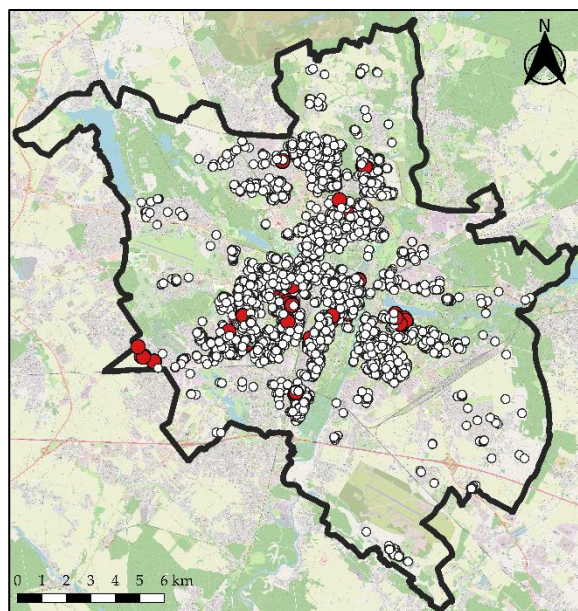

(b)

### LEGEND

- Not significant at 95%
- Significant at 95%
- ▭ City of Poznań

**Figure S7. (a)** Local estimated coefficients – Distance to surface water. **(b)** Statistical significance of estimated coefficients – Distance to surface water.

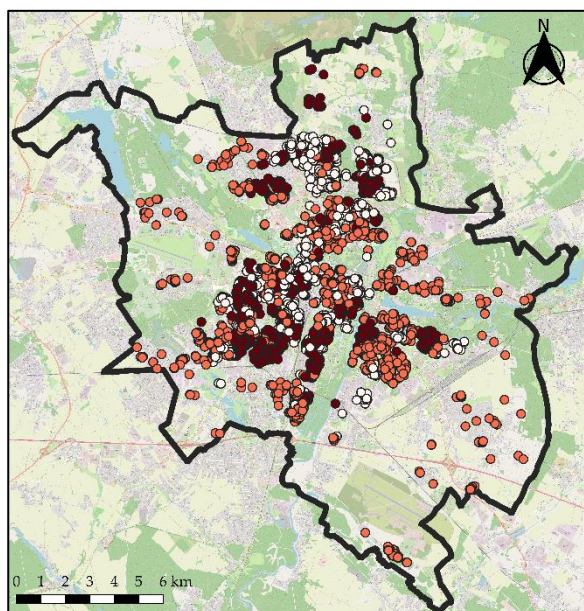

(a)

### LEGEND

#### Coefficient

- -143.80 - -1.10
- -1.1 - 0.90
- 0.90 - 283.90
- ▭ City of Poznań

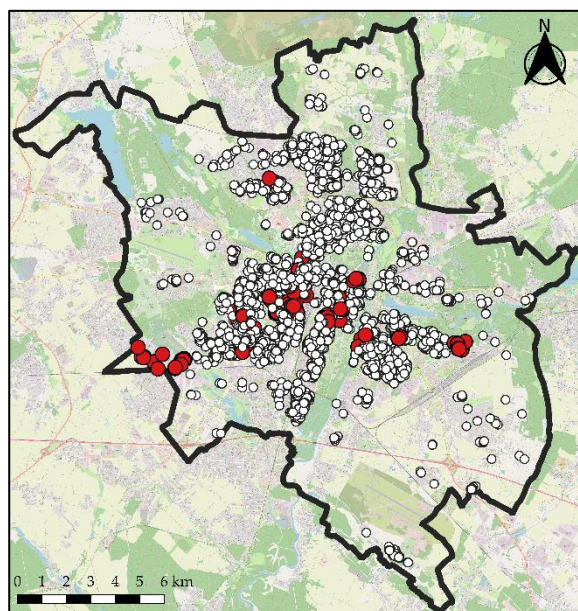

(b)

### LEGEND

- Not significant at 95%
- Significant at 95%
- ▭ City of Poznań

**Figure S8. (a)** Local estimated coefficients – Distance to major roads. **(b)** Statistical significance of estimated coefficients – Distance to major roads.

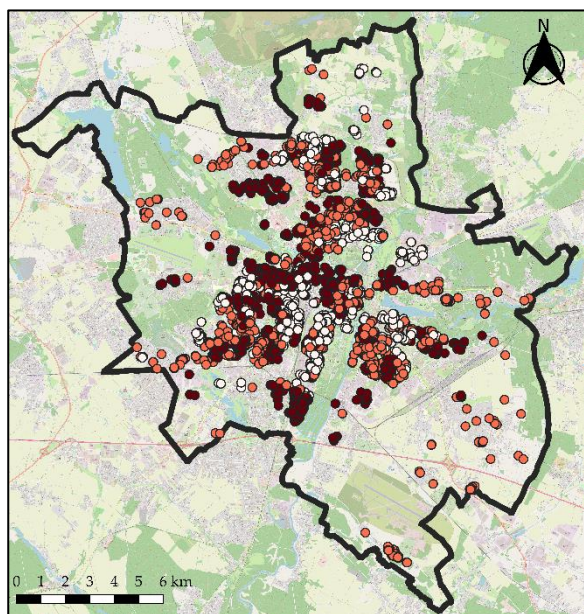

(a)

### LEGEND

#### Coefficient

○ -39.03 - -0.57

● -0.57 - 0.22

● 0.22 - 24.27

▭ City of Poznań

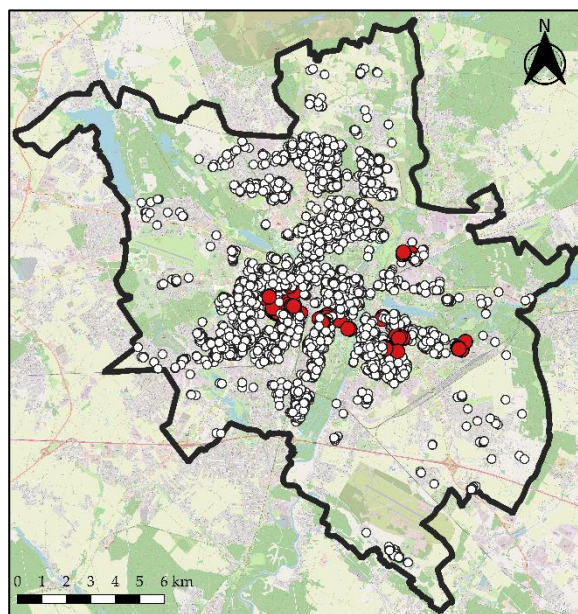

(b)

### LEGEND

○ Not significant at 95%

● Significant at 95%

▭ City of Poznań

**Figure S9. (a)** Local estimated coefficients – Distance from educational institutions. **(b)** Statistical significance of estimated coefficients – Distance from educational institutions.
